# Supplementary material
Source: PubMed Central journal article supplement (PMC6997726)
Supplement: AEM.02193-19-s0001.pdf [file AEM.02193-19-s0001.pdf]

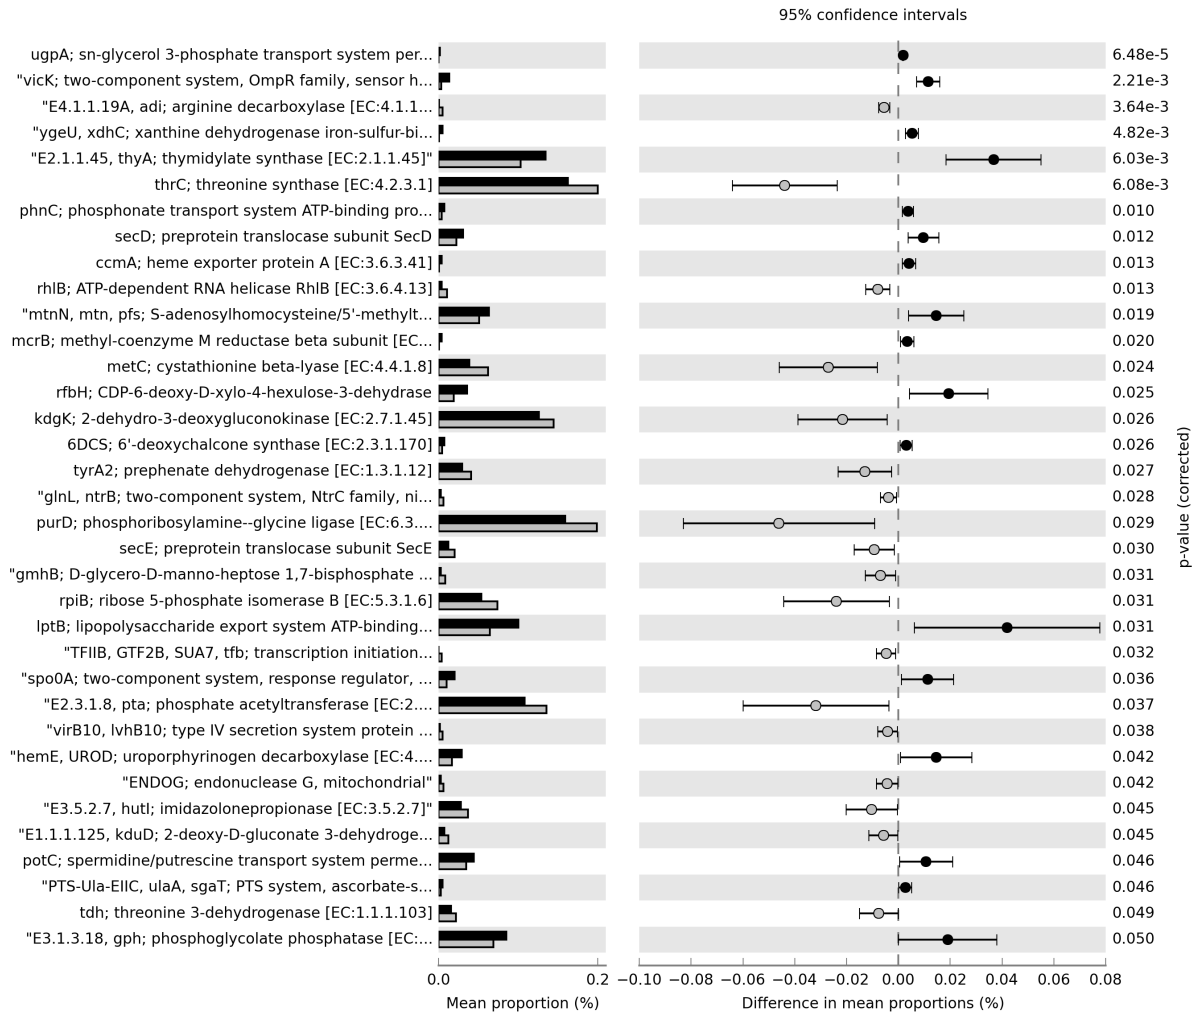

1  
2 Figure S1. Relative abundance of sequences of functional genes (35) that were affected by  
3 LPS dosing based on KEEG database (black: control; grey: LPS).

4

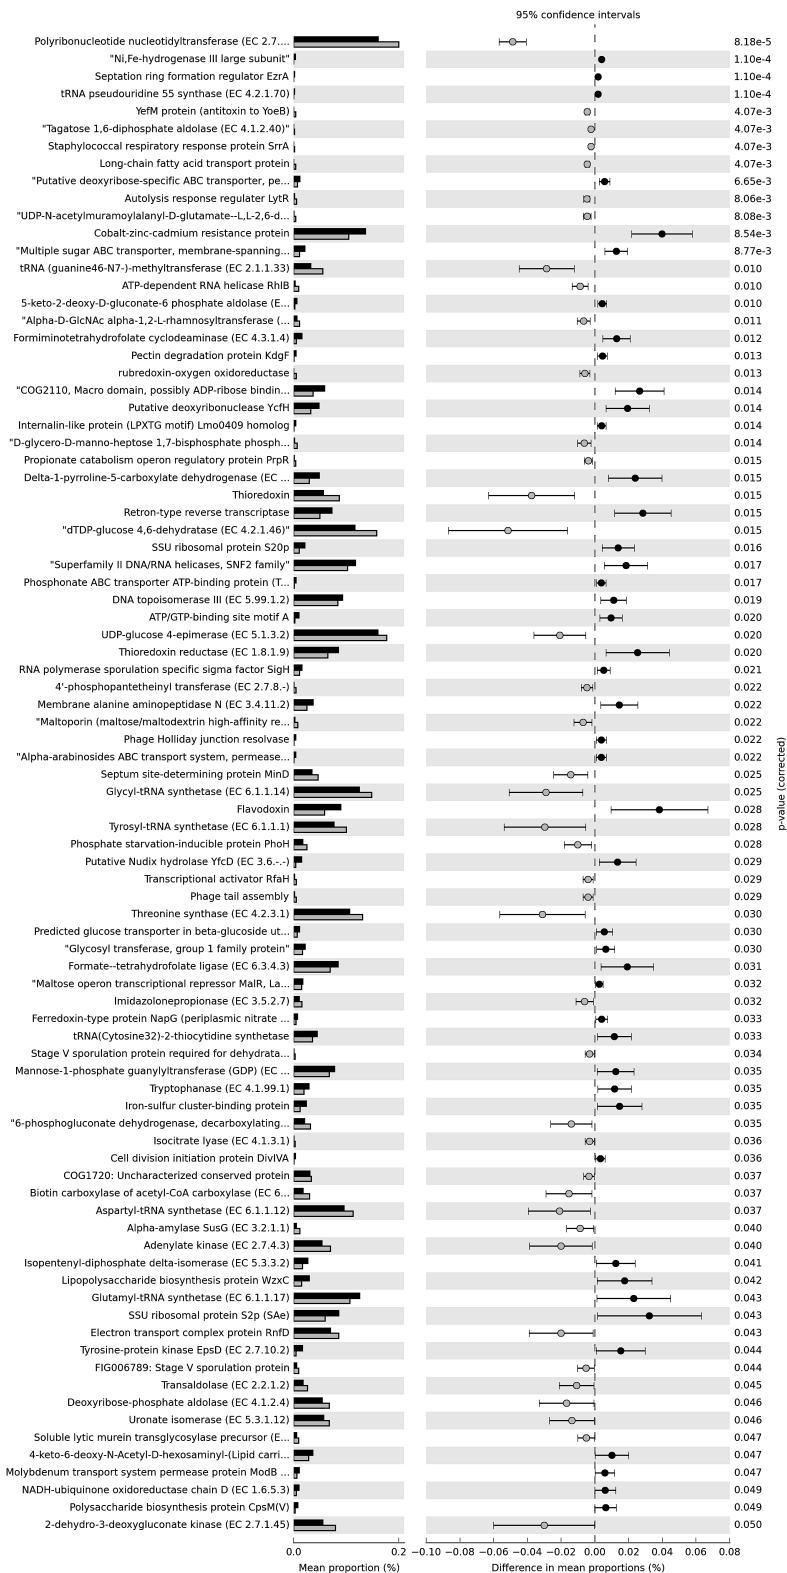

5  
6 Figure S2. Relative abundance of sequences of functional genes (86) that were affected by  
7 LPS dosing based on SEED database (black: control; grey: LPS)

8
